# Supplementary material for: A cognitive neurogenetic approach to uncovering the structure of executive functions
Source: PubMed Central journal article supplement (PMC9357028; doi:10.1038/s41467-022-32383-0), 2022-08-06
Supplement: 41467_2022_32383_MOESM1_ESM.pdf [file 41467_2022_32383_MOESM1_ESM.pdf]

30 voltage-gated cation channel activity ( $p = 2.26 \times 10^{-19}$ ), cation channel activity ( $p = 4.44 \times$   
31  $10^{-19}$ ), channel activity ( $p = 8.09 \times 10^{-19}$ ). In terms of **GO biological process**, these  
32 genes showed overrepresentation in synaptic signaling ( $p = 2.70 \times 10^{-53}$ ), anterograde  
33 trans-synaptic signaling ( $p = 2.70 \times 10^{-53}$ ), chemical synaptic transmission ( $p = 2.70 \times 10^{-$   
34  $53$ ), trans-synaptic signaling ( $p = 9.04 \times 10^{-53}$ ) and cell-cell signaling ( $p = 3.62 \times 10^{-41}$ ). In  
35 terms of **GO cellular component**, the MFG-related genes are mainly enriched for  
36 synapse ( $p = 8.54 \times 10^{-52}$ ), neuron projection ( $p = 3.49 \times 10^{-40}$ ), glutamatergic synapse ( $p$   
37  $= 9.86 \times 10^{-35}$ ), synaptic membrane ( $p = 1.67 \times 10^{-34}$ ), and somatodendritic compartment  
38 ( $p = 1.21 \times 10^{-33}$ ). For **mouse phenotype**, these genes were enriched for abnormal  
39 synaptic transmission ( $p = 1.60 \times 10^{-18}$ ), abnormal CNS synaptic transmission ( $p = 1.59 \times$   
40  $10^{-16}$ ), abnormal nervous system physiology ( $p = 1.81 \times 10^{-16}$ ), abnormal  
41 learning/memory/conditioning ( $p = 7.39 \times 10^{-16}$ ), abnormal cognition ( $p = 7.39 \times 10^{-16}$ ). In  
42 annotation of **pathway**, these genes showed enrichment in neuroactive ligand-receptor  
43 interaction ( $p = 6.49 \times 10^{-14}$ ), calcium signaling pathway ( $p = 1.05 \times 10^{-12}$ ), monoamine  
44 GPCRs ( $p = 1.78 \times 10^{-8}$ ), Heterotrimeric G-protein signaling pathway-Gi alpha and Gs  
45 alpha mediated pathway ( $p = 1.47 \times 10^{-7}$ ), and axon guidance ( $p = 3.06 \times 10^{-7}$ ). For  
46 **disease**, these genes are enriched in schizophrenia ( $p = 1.18 \times 10^{-26}$ ), chronic alcoholic  
47 intoxication ( $p = 1.43 \times 10^{-15}$ ), bipolar disorder ( $p = 1.43 \times 10^{-15}$ ), autistic disorders ( $p =$   
48  $1.80 \times 10^{-13}$ ), mental disorders ( $p = 3.04 \times 10^{-13}$ ).

49

50 **SCG-related genes** also showed significant enrichment (see Supplementary Data). For  
51 **GO molecular functions**: signaling receptor binding ( $p = 1.97 \times 10^{-9}$ , FDR-BH corrected,  
52 hereafter), channel activity ( $p = 2.36 \times 10^{-7}$ ), passive transmembrane transporter activity  
53 ( $p = 2.36 \times 10^{-7}$ ), metal ion transmembrane transporter activity ( $p = 6.32 \times 10^{-7}$ ),  
54 potassium channel activity ( $p = 6.32 \times 10^{-7}$ ). For **GO biological process**: synaptic  
55 signaling ( $p = 3.85 \times 10^{-28}$ ), trans-synaptic signaling ( $p = 1.09 \times 10^{-27}$ ), cell-cell signaling  
56 ( $p = 1.67 \times 10^{-27}$ ), anterograde trans-synaptic signaling ( $p = 2.24 \times 10^{-27}$ ), and chemical  
57 synaptic transmission ( $p = 2.24 \times 10^{-27}$ ). For **GO cellular component**: synapse ( $p = 7.85$   
58  $\times 10^{-35}$ ), neuron projection ( $p = 1.90 \times 10^{-31}$ ), somatodendritic compartment ( $p = 2.28 \times$

59  $10^{-25}$ ), synaptic membrane ( $p = 4.12 \times 10^{-20}$ ), and dendritic tree ( $p = 4.12 \times 10^{-20}$ ). For  
60 **mouse phenotype**: abnormal nervous system physiology ( $p = 1.30 \times 10^{-13}$ ), abnormal  
61 CNS synaptic transmission ( $p = 1.79 \times 10^{-10}$ ), abnormal synaptic transmission ( $p = 4.67 \times$   
62  $10^{-10}$ ), abnormal learning/memory/conditioning ( $p = 3.39 \times 10^{-9}$ ), abnormal cognition ( $p =$   
63  $3.39 \times 10^{-9}$ ). For **pathway**: neuroactive ligand-receptor interaction ( $p = 1.44 \times 10^{-5}$ ), spinal  
64 cord injury ( $p = 3.58 \times 10^{-5}$ ), ensemble of genes encoding core extracellular matrix  
65 including ECM glycoproteins, collagens and proteoglycans ( $p = 5.96 \times 10^{-5}$ ), Myometrial  
66 relaxation and contraction pathways ( $p = 3.43 \times 10^{-4}$ ), and calcium regulation in the  
67 cardiac cell ( $p = 4.47 \times 10^{-4}$ ). For **disease**: anxiety ( $p = 7.79 \times 10^{-13}$ ), anxiety disorders ( $p$   
68  $= 1.30 \times 10^{-12}$ ), schizophrenia ( $p = 8.48 \times 10^{-11}$ ), mental disorders ( $p = 1.61 \times 10^{-9}$ ),  
69 bipolar disorder ( $p = 1.61 \times 10^{-9}$ ).

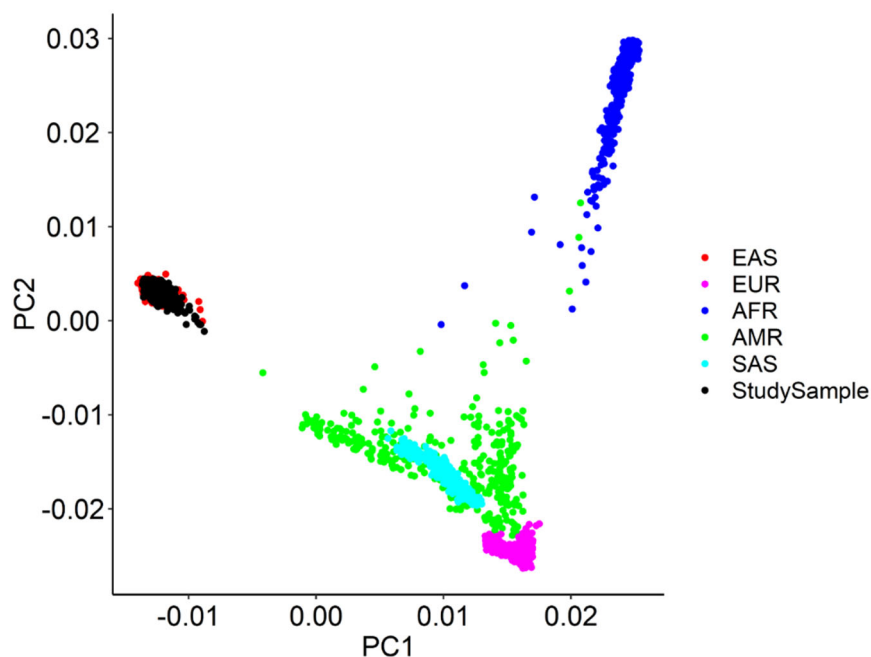

70

71 **Supplementary Fig. 1. Principal component analysis (PCA) of 2110 subjects.**

72 The PCA is based on ~3 million common SNPs on 1000Genome phase3 data. EAS: East  
73 Asian, EUR: European, AFR: African, AMR: Ad Mixed American, SAS: South Asian,  
74 StudySample: 2110 subjects used in the current study. Source data are provided as a  
75 Source Data file.

76

77

"S/I+U"

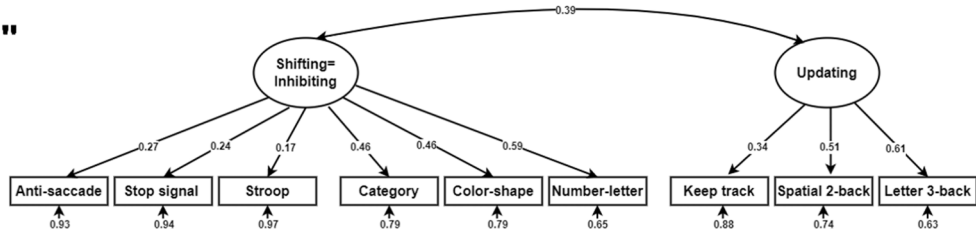

"S/U+I"

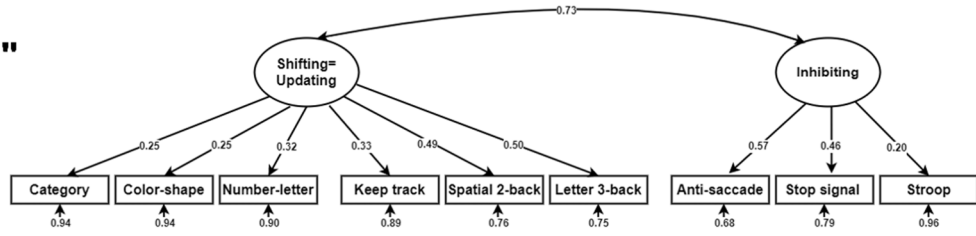

"G"

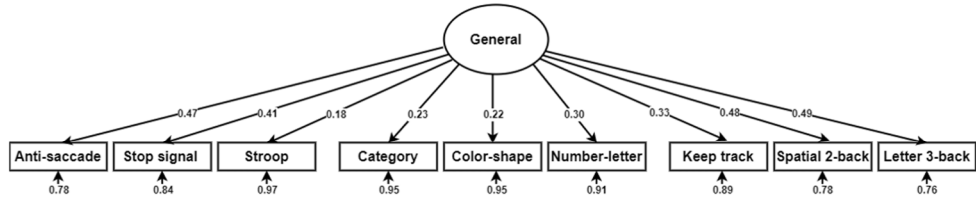

"C+I+U+S"

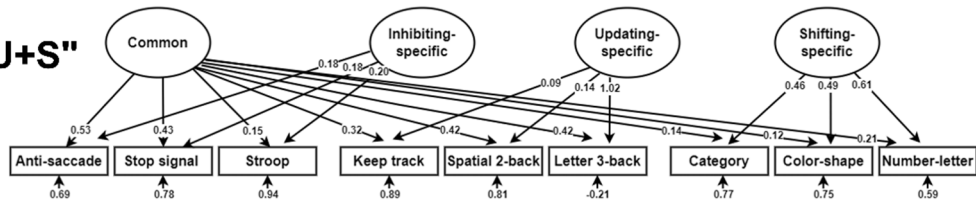

"C+I+U"

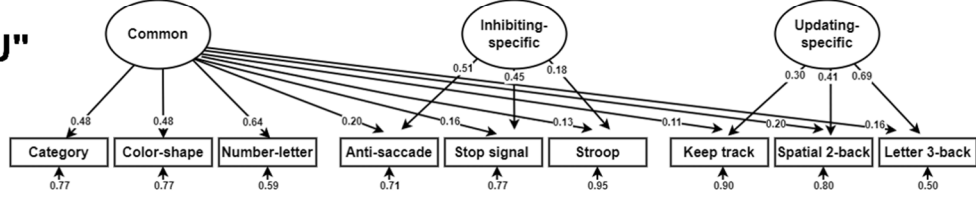

"C+I"

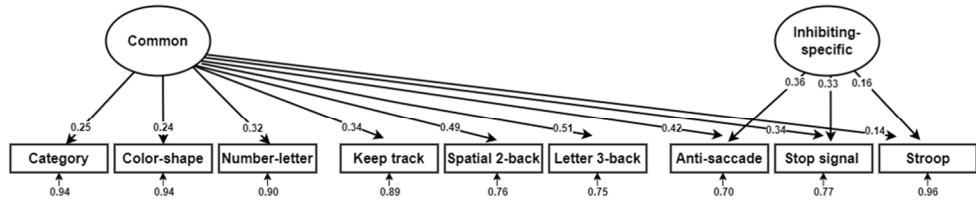

"C+U"

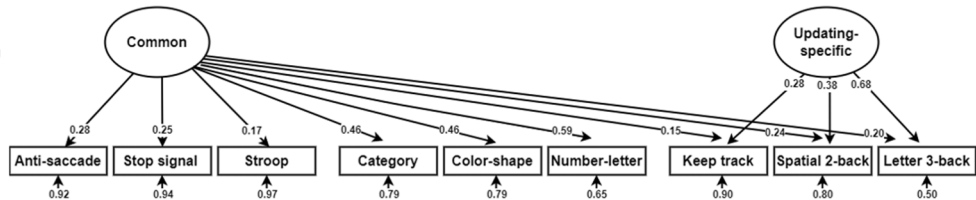

78

79 **Supplementary Fig. 2. Latent variable models of EFs (seven other models).** See  
 80 Table 1 for fit statistics for these models. Source data are provided as a Source Data file.

81

82

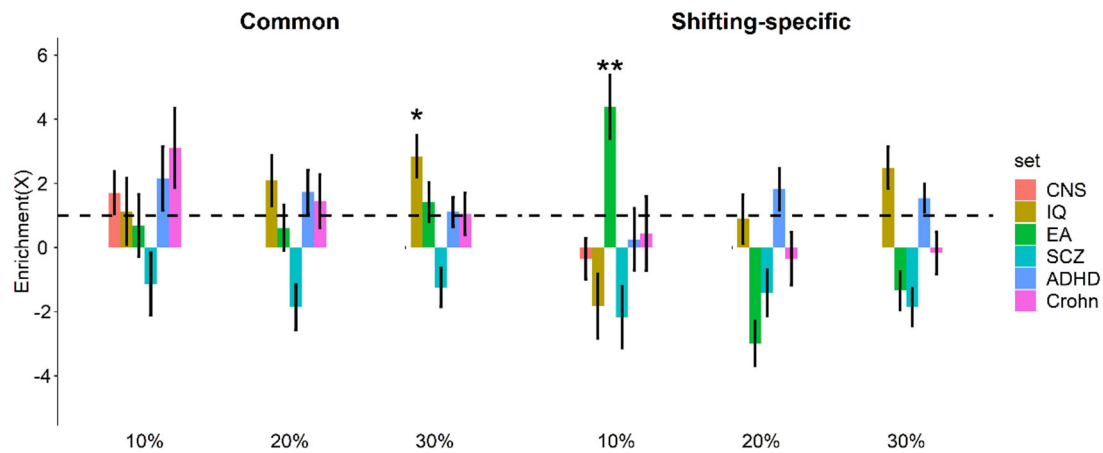

83

84 **Supplementary Fig. 3. Enrichment heritability pattern of the candidate gene sets**  
 85 **for the common EF and shifting-specific components (n = 1454 subjects).** The null  
 86 hypothesis of 1.0 enrichment is shown by a dashed dark horizontal line. The *p* values  
 87 indicate the significance of the difference from the expectation. Error bars represent the  
 88 SE of enrichment folds (= SE(set) / %SNP). Significant results after FDR-BH correction  
 89 are marked with asterisks (\*\* represents *p* values < .01, \* represents *p* values < .05,  
 90 exact *p* values are provided in Source Data file, one-sided test). We selected the top 10%  
 91 SNPs of the ranked genome data as trait-associated variants. CNS: genes preferentially  
 92 expressed in the central nervous system; IQ: SNPs associated with human intelligence;  
 93 EA: SNPs associated with educational attainment; SCZ: schizophrenia-associated SNPs;  
 94 ADHD: ADHD-associated SNPs; Crohn: SNPs associated with Crohn's disease. Please  
 95 note that the heritability ( $h^2$ ) is per definition non-negative. However, in some cases,  
 96 negative values can be obtained from unbiased estimators. As discussed in Yang et al.<sup>8</sup>  
 97 and Elhezzani<sup>9</sup>, a negative estimate could be due to a close-to-zero true value or  
 98 substantial uncertainty in estimation. For this reason, negative enrichment was thus not  
 99 considered further. Source data are provided as a Source Data file.

100

101

102

103

104

105

**Supplementary Table 1. Descriptive statistics for the nine EF measures**

|                     | N    | Mean   | SD     | Min     | Max    | Skew | Kurtosis | IC               |
|---------------------|------|--------|--------|---------|--------|------|----------|------------------|
| Anti-saccade(d')    | 2015 | .25    | .13    | .00     | .58    | .33  | -.59     | .90              |
| Stop-signal (ms)    | 1862 | 215.18 | 40.89  | 110.33  | 320.01 | .10  | .01      | .55 <sup>a</sup> |
| Stroop (ms)         | 1990 | 138.67 | 82.36  | -77.75  | 347.31 | .40  | .07      | .33              |
| Category (ms)       | 2042 | 295.22 | 138.70 | -89.64  | 667.51 | .31  | -.08     | .51              |
| Color-shape (ms)    | 1965 | 326.28 | 196.78 | -181.69 | 818.83 | .57  | .10      | .70              |
| Number-letter (ms)  | 1901 | 300.98 | 172.15 | -153.35 | 729.32 | .62  | .04      | .79              |
| Keep track (nc)     | 1980 | 30.70  | 3.11   | 23.00   | 36.00  | -.52 | -.27     | .67 <sup>b</sup> |
| Spatial 2-back (d') | 1940 | 2.80   | .93    | .20     | 4.65   | -.11 | -.32     | .76              |
| Letter 3-back (d')  | 1957 | 1.98   | .89    | -.07    | 4.40   | .74  | -.03     | .81              |

106 SD = standard deviation; Min = minimum; ax = maximum. IC= internal consistency. d' =

107 dprime; ms = millisecond; nc = number of corrected trials.

108 Unless otherwise noted, IC was calculated by adjusting split-half (odd–even) correlations  
109 with the Spearman-Brown prophecy formula.110 <sup>a</sup> For the stop-signal task, we used four stair-cases with different starting values, which  
111 were randomly mixed together. We therefore calculated the SSRT for the last two blocks.112 The split-half correlation was calculated based on 391 subjects who had at least one  
113 inflection point for one of the four stair cases in both blocks were used.114 <sup>b</sup> IC was calculated using Cronbach's alpha across 4 sets of trials at each difficulty level  
115 for keep track.

116

117

118

**Supplementary Table 2. Pearson Correlation of the nine EF measures**

|                  | 1      | 2      | 3      | 4      | 5      | 6      | 7      | 8      | 9 |
|------------------|--------|--------|--------|--------|--------|--------|--------|--------|---|
| 1.Anti-saccade   | —      |        |        |        |        |        |        |        |   |
| 2.Stop-signal    | .26*** | —      |        |        |        |        |        |        |   |
| 3.Stroop         | .11*** | .10*** | —      |        |        |        |        |        |   |
| 4.Category       | .09*** | .06*   | .06**  | —      |        |        |        |        |   |
| 5.Color-shape    | .03    | .05*   | .05*   | .24*** | —      |        |        |        |   |
| 6.Number-letter  | .10*** | .08**  | .08*** | .31*** | .32*** | —      |        |        |   |
| 7.Keep track     | .16*** | .16*** | .01    | .01    | .04    | .07**  | —      |        |   |
| 8.Spatial 2-back | .22*** | .16*** | .07**  | .07**  | .06**  | .10*** | .14*** | —      |   |
| 9.Letter 3-back  | .22*** | .18*** | .05*   | .04    | .07**  | .07**  | .22*** | .31*** | — |

119

The significant results after FDR-BH correction are noted with asterisks (\*\*\*) represents  $p$

120

values < .001, \* represents  $p$  values < .05, exact  $p$  values are provided in Source Data

121

file, two-sided test). Source data are provided as a Source Data file.

122

123

124

125 **Supplementary Table 3. Model fit statistics of the 12 EF latent variable models (list-**  
 126 **wise deletion)**

| Model                            | $\chi^2$     | df        | CFI        | RMSEA      | SRMR       |
|----------------------------------|--------------|-----------|------------|------------|------------|
| <b>Correlated-factors models</b> |              |           |            |            |            |
| <b>1. I+U+S</b>                  | <b>44.73</b> | <b>24</b> | <b>.98</b> | <b>.02</b> | <b>.02</b> |
| 2. S/I+U                         | 270.89       | 26        | .73        | .08        | .07        |
| <b>3. U/I+S</b>                  | <b>84.44</b> | <b>26</b> | <b>.93</b> | <b>.04</b> | <b>.03</b> |
| 4. S/U+I                         | 347.16       | 26        | .64        | .09        | .07        |
| 5. G                             | 380.25       | 27        | .60        | .10        | .07        |
| <b>Bifactor models</b>           |              |           |            |            |            |
| 6. C+I+U+S                       | 28.91        | 18        | .99        | .02        | .02        |
| <b>7. C+I+S</b>                  | <b>46.50</b> | <b>21</b> | <b>.97</b> | <b>.03</b> | <b>.03</b> |
| 8. C+I+U                         | 158.44       | 21        | .85        | .07        | .06        |
| <b>9. C+U+S</b>                  | <b>29.44</b> | <b>21</b> | <b>.99</b> | <b>.02</b> | <b>.02</b> |
| 10. C+I                          | 346.93       | 24        | .64        | .10        | .07        |
| <b>11. C+S</b>                   | <b>82.45</b> | <b>24</b> | <b>.93</b> | <b>.04</b> | <b>.03</b> |
| 12. C+U                          | 259.38       | 24        | .74        | .08        | .07        |

127 The good-fit models are indicated in bold. It is worth noting that although the fit indices of  
 128 the bifactor three-factor (C+I+U+S) model were good (CFI= .99, RMSEA = .02,  
 129 SRMR= .02), the three tasks' loadings on inhibiting-specific component (anti-saccade:  $p$   
 130 = .55, stop-signal:  $p$  = .39, Stroop:  $p$  = .43) and updating-specific component (keep track:  
 131  $p$  = .20, spatial 2-back:  $p$  = .20, letter 3-back:  $p$  = .10) were not significant.

132  
 133



**Supplementary Table 4. CPM prediction results using two other thresholds**

| Model | component | $p = .01$ |                | $p = .1$ |                |
|-------|-----------|-----------|----------------|----------|----------------|
|       |           | $r$       | $p_{(FDR-BH)}$ | $r$      | $p_{(FDR-BH)}$ |
| I+U+S | I         | .15       | 6.5e-4         | .18      | 2.17e-4        |
|       | U         | .15       | 5.2e-4         | .19      | 2.17e-4        |
|       | S         | .07       | .10            | .06      | .09            |
| U/I+S | U/I       | .16       | 4.3e-4         | .19      | 2.17e-4        |
|       | S         | .07       | .10            | .06      | .09            |
| C+I+S | C         | .16       | 4.3e-4         | .19      | 2.17e-4        |
|       | I         | .06       | .11            | .06      | .09            |
|       | S         | .10       | .03            | .08      | .06            |
| C+U+S | C         | .16       | 5.2e-4         | .19      | 2.17e-4        |
|       | U         | -.01      | .57            | .07      | .19            |
|       | S         | .09       | .04            | .08      | .06            |
| C+S   | C         | .16       | 4.3e-4         | .19      | 2.17e-4        |
|       | S         | .10       | .03            | .08      | .06            |

135 I = inhibiting or inhibiting-specific; U=updating or updating-specific; S = shifting or shifting-  
 136 specific; U/I = (updating = inhibiting); C = common. Correction for multiple comparisons  
 137 was performed with the FDR-BH; one-sided permutation test.

138

139

140

141

142

143

144 **Supplementary Table 5. The specific brain regions for Common and Shifting-**  
 145 **specific components from the CPM results**

| Cluster                            | MNI |     |     | N  |
|------------------------------------|-----|-----|-----|----|
|                                    | X   | Y   | Z   |    |
| <b>Common component</b>            |     |     |     |    |
| precentral gyrus                   | 44  | -8  | 57  | 30 |
| inferior temporal gyrus            | -56 | -45 | -24 | 29 |
| frontal pole                       | 8   | 41  | -24 | 27 |
| LOC                                | -39 | -75 | 44  | 19 |
| LOC                                | -41 | -75 | 26  | 16 |
| frontal pole                       | 6   | 64  | 22  | 16 |
| inferior temporal gyrus            | 55  | -31 | -17 | 15 |
| MFG                                | 48  | 25  | 27  | 15 |
| frontal pole                       | -39 | 51  | 17  | 15 |
| middle temporal gyrus              | 56  | -46 | 11  | 15 |
| <b>Shifting-specific component</b> |     |     |     |    |
| LOC                                | 37  | -65 | 40  | 20 |
| paracingulate gyrus                | 6   | 54  | 16  | 19 |
| planum temporale                   | 58  | -16 | 7   | 16 |
| paracingulate/SMC                  | 7   | 8   | 51  | 15 |
| planum temporale                   | 32  | -26 | 13  | 14 |
| frontal orbital cortex             | 27  | 16  | -17 | 14 |
| LOC                                | 37  | -81 | 1   | 14 |
| postcentral gyrus                  | 42  | -20 | 55  | 11 |
| precentral gyrus                   | 2   | -28 | 60  | 11 |
| central opercular cortex           | -55 | -9  | 12  | 11 |

146 SMC = supplementary motor cortex, MFG = middle frontal gyrus, LOC= lateral occipital  
 147 cortex. N = the number of contributing edges each node had.

148 **Supplementary Table 6. The brain regions for Common and Shifting-specific**  
 149 **components from the conjunction of CPM and Neurosynth results**

| Components            | Neurosynth<br>Cluster | No. of<br>Voxels | COG |     |    | Node Atlas                              |
|-----------------------|-----------------------|------------------|-----|-----|----|-----------------------------------------|
|                       |                       |                  | X   | Y   | Z  |                                         |
| Common                | MFG                   | 50               | 48  | 25  | 27 | MFG (86 voxels,<br>MNI= 48,25,27)       |
| Shifting-<br>specific | paracingulate/<br>SMC | 45               | 6   | 9   | 51 | Paracingulate (54<br>voxels,MNI=7,8,51) |
|                       | LOC                   | 27               | 34  | -64 | 40 | LOC (72 voxels,<br>MNI=37, -65,40)      |

150 SMC = supplementary motor cortex, MFG = middle frontal gyrus, LOC= lateral occipital  
 151 cortex, COG = center of gravity.

152

153

154

155

156

157

158

159

160

161

162

163

164

165

166

167

168 **Supplementary Table 7. Enrichment patterns of the Allen brain expression**

169 **candidate gene sets (using other gene boundaries)**

| Components        | Gene sets         | Gene boundary | <i>P</i><br>(95%) | <i>P</i><br>(75%) | EXP#genes<br>(75%) | OBS#genes<br>(75%) | <i>P</i> <sub>(FDR-BH)</sub><br>(75%) |     |
|-------------------|-------------------|---------------|-------------------|-------------------|--------------------|--------------------|---------------------------------------|-----|
| Common            | MFG               | 25kb          | .17               | 3.0e-4            | 244                | 287                | 3.6e-3                                |     |
|                   |                   | 50kb          | .15               | 9.4e-3            | 239                | 266                | 5.6e-2                                |     |
|                   | SCG               | 25kb          | .38               | .10               | 241                | 257                | .14                                   |     |
|                   |                   | 50kb          | .33               | .09               | 237                | 252                | .22                                   |     |
|                   | LOC               | 25kb          | .37               | .09               | 245                | 262                | .14                                   |     |
|                   |                   | 50kb          | .31               | .46               | 240                | 239                | .50                                   |     |
|                   | BG                | 25kb          | .69               | .12               | 242                | 256                | .14                                   |     |
|                   |                   | 50kb          | .11               | .09               | 238                | 253                | .22                                   |     |
|                   | Updating-specific | MFG           | 25kb              | .14               | .08                | 243                | 261                                   | .14 |
|                   |                   |               | 50kb              | .57               | .16                | 241                | 252                                   | .27 |
| SCG               |                   | 25kb          | .16               | .11               | 242                | 257                | .14                                   |     |
|                   |                   | 50kb          | .60               | .25               | 238                | 245                | .38                                   |     |
| LOC               |                   | 25kb          | .14               | .14               | 243                | 256                | .15                                   |     |
|                   |                   | 50kb          | .74               | .11               | 240                | 254                | .22                                   |     |
| BG                |                   | 25kb          | .04               | .43               | 242                | 244                | .43                                   |     |
|                   |                   | 50kb          | .82               | .68               | 239                | 232                | .68                                   |     |
| Shifting-specific |                   | MFG           | 25kb              | .29               | .04                | 145                | 162                                   | .14 |
|                   |                   |               | 50kb              | .32               | .05                | 143                | 158                                   | .20 |
|                   | SCG               | 25kb          | .17               | .02               | 139                | 161                | .12                                   |     |
|                   |                   | 50kb          | .64               | 6.8e-3            | 138                | 161                | 5.6e-2                                |     |
|                   | LOC               | 25kb          | .30               | .09               | 150                | 163                | .14                                   |     |
|                   |                   | 50kb          | .49               | .33               | 148                | 152                | .44                                   |     |
|                   | BG                | 25kb          | .96               | .12               | 139                | 151                | .14                                   |     |
|                   |                   | 50kb          | .89               | .39               | 138                | 140                | .47                                   |     |

170 See Table 3 for definition of acronyms. Correction for multiple comparisons was

171 performed with the FDR-BH. One-sided permutation test.

172

**Supplementary Table 8. High dimensional mediation analyses results**

| Components        | Gene<br>boundary | VIE  | VDE   | PVM   | $p_{\text{permutation}}$ | $p_{\text{(FDR-BH)}}$ |
|-------------------|------------------|------|-------|-------|--------------------------|-----------------------|
| Common            | 25kb             | .023 | .093  | .201  | 4.4e-3                   | 9.4e-3                |
|                   | 35kb             | .027 | .114  | .190  | 4.7e-3                   | 9.4e-3                |
|                   | 50kb             | .034 | .142  | .193  | 4.2e-3                   | 9.4e-3                |
| Shifting-specific | 25kb             | .016 | -.096 | -.203 | .995                     | .996                  |
|                   | 35kb             | .016 | -.104 | -.176 | .996                     | .996                  |
|                   | 50kb             | .019 | -.106 | -.220 | .996                     | .996                  |

173 Exposure: genotype of MFG-related genes or SCG-related genes; Mediator: selected  
 174 edges in CPM for EF components; Outcome: EF components. VIE = variance indirect  
 175 effect, VDE = variance direct effect, PVM = proportion of the variance mediated.  
 176 Correction for multiple comparisons was performed with the FDR-BH. One-sided  
 177 permutation test.

178

179

**Supplementary References**

- 181 1. Chen, J., Bardes, E.E., Aronow, B.J. & Jegga, A.G. ToppGene Suite for gene list  
 182 enrichment analysis and candidate gene prioritization. *Nucleic Acids Res* **37**,  
 183 W305-11 (2009).
- 184 2. Harris MA, C.J., Ireland A, Lomax J, Ashburner M, Foulger R, Eilbeck *et al.* The  
 185 Gene Ontology (GO) database and informatics resource. *Nucleic Acids Res*  
 186 **32**(2004).
- 187 3. Kanehisa M, G.S., Hattori M, Aoki-Kinoshita KF, Itoh M, & Kawashima S, K.T.,  
 188 Araki M, Hirakawa M. From genomics to chemical genomics: new developments  
 189 in KEGG. *Nucleic Acids Res* **34**(2006).
- 190 4. Karp PD, O.C., Moore-Kochlacs C, Goldovsky L, Kaipa P, & Ahren D, T.S.,  
 191 Darzentas N, Kunin V, Lopez-Bigas N. Expansion of the BioCyc collection of  
 192 pathway/genome databases to 160 genomes. *Nucleic Acids Res* **33**, 6083-6089  
 193 (2005).
- 194 5. Joshi-Tope G, G.M., Vastrik I, D'Eustachio P, Schmidt E, de, Bono B, J.B.,  
 195 Gopinath GR, Wu GR, Matthews L, Lewis S, Birney & E, S.L. Reactome: a  
 196 knowledgebase of biological pathways. *Nucleic Acids Res* **33**(2005).
- 197 6. Dahlquist KD, S.N., Vranizan K, Lawlor SC, Conklin BR. GenMAPP, a new tool  
 198 for viewing and analyzing microarray data on biological pathways. *Nat Genet* **31**,  
 199 19-20 (2002).

- 200 7. Benjamini, Y. & Hochberg, Y. controlling the false discovery rate a practical and  
201 powerful approach to multiple testing. *JOURNAL OF THE ROYAL STATISTICAL*  
202 *SOCIETY. Series B(Methodological)* **57**, 289-300 (1995).
- 203 8. Yang, J. *et al.* Ubiquitous polygenicity of human complex traits: genome-wide  
204 analysis of 49 traits in Koreans. *PLoS Genet* **9**, e1003355 (2013).
- 205 9. Elhezzani, N.S. Improved estimation of SNP heritability using Bayesian multiple-  
206 phenotype models. *Eur J Hum Genet* **26**, 723-734 (2018).
- 207
